# Supplementary material for: Morpho-Histology, Endogenous Hormone Dynamics, and Transcriptome Profiling in Dacrydium Pectinatum during Male Cone Development
Source: MDPI journal article supplement (doi:10.3390/f12111598), 2021-11-19
Supplement: s1 [file s1]

**Supplementary Table S1.** Sequences of primers used for RT-qPCR.

| Gene ID                                           | Forward Primer (5'-3')  | Reverse Primer (5'-3') |
|---------------------------------------------------|-------------------------|------------------------|
| Translation elongation factor<br>(EF1- $\alpha$ ) | GCAAGGAACTGGAGAAGGAACCC | GACGCATGTCCCTCACAGCAA  |
| Cluster-11431.10094                               | TGGAGTTGCAAAGCCTCAGA    | CCCAGCTAAAGTCACTGCGA   |
| Cluster-11431.4568                                | GGCTCCAAGAAGACGGGAAA    | TCGAAGAGTTTGCCCGTTGA   |
| Cluster-11431.21928                               | GCGTTGTGGTCTCTTCGGTA    | AGGCCTTGAATGGGGTTTCT   |
| Cluster-11431.38307                               | CATGGCCCGAGGAAAGAGAG    | TAACCCACACTAACGTCGC    |
| Cluster-11431.38306                               | TGACATTCACCAAGAGACGTCG  | TAACCCACACTAACGTCGC    |
| Cluster-11431.10014                               | GCCGCCAAAGAGCTCTGATA    | AGCTGCGTTTATCCACCACA   |
| Cluster-11431.12684                               | TTAGCGACCTCCTGCACAAG    | TTTGAGTCAAATGCGCGGAC   |
