# Supplementary material for: Morpho-Histology, Endogenous Hormone Dynamics, and Transcriptome Profiling in Dacrydium Pectinatum during Male Cone Development
Source: MDPI journal article supplement (doi:10.3390/f12111598), 2021-11-19
Supplement: s1 [file s1]

**Supplementary Table S3.** KEGG pathway annotation of *Dacrydium pectinatum* unigenes.

| Pathway                                     | Pathway ID | Number of unigenes | Percentage (%) |
|---------------------------------------------|------------|--------------------|----------------|
| Ribosome                                    | ko03010    | 1244               | 8.95           |
| Carbon metabolism                           | ko01200    | 696                | 5.00           |
| Biosynthesis of amino acids                 | ko01230    | 499                | 3.59           |
| Plant-pathogen interaction                  | ko04626    | 483                | 3.47           |
| Protein processing in endoplasmic reticulum | ko04141    | 398                | 2.86           |
| Spliceosome                                 | ko03040    | 366                | 2.63           |
| Oxidative phosphorylation                   | ko00190    | 346                | 2.49           |
| Glycolysis / Gluconeogenesis                | ko00010    | 326                | 2.34           |
| RNA transport                               | ko03013    | 311                | 2.24           |
| Endocytosis                                 | ko04144    | 286                | 2.06           |
| Glyoxylate and dicarboxylate metabolism     | ko00630    | 251                | 1.80           |
| Phenylpropanoid biosynthesis                | ko00940    | 233                | 1.68           |
| Starch and sucrose metabolism               | ko00500    | 223                | 1.60           |
| Plant hormone signal transduction           | ko04075    | 219                | 1.57           |
| Carbon fixation in photosynthetic organisms | ko00710    | 216                | 1.55           |
| Pyruvate metabolism                         | ko00620    | 212                | 1.52           |
| Citrate cycle (TCA cycle)                   | ko00020    | 205                | 1.47           |
| Peroxisome                                  | ko04146    | 200                | 1.44           |
| Purine metabolism                           | ko00230    | 197                | 1.42           |
| Amino sugar and nucleotide sugar metabolism | ko00520    | 189                | 1.36           |
