# Supplementary material for: Morpho-Histology, Endogenous Hormone Dynamics, and Transcriptome Profiling in Dacrydium Pectinatum during Male Cone Development
Source: MDPI journal article supplement (doi:10.3390/f12111598), 2021-11-19
Supplement: s1 [file s1]

**Supplementary Figure S5.** Distribution of simple sequence repeats (SSRs) identified in the transcriptome of *Dacrydium pectinatum*.

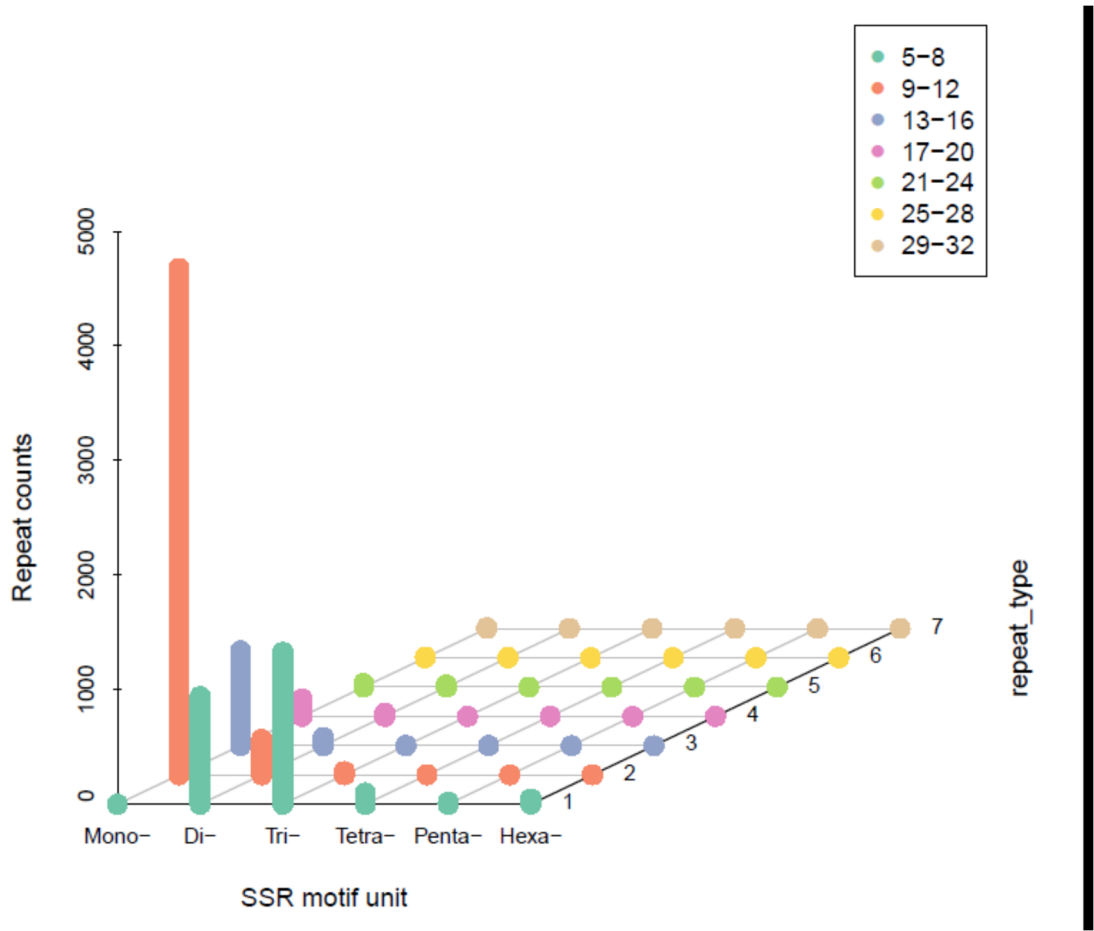

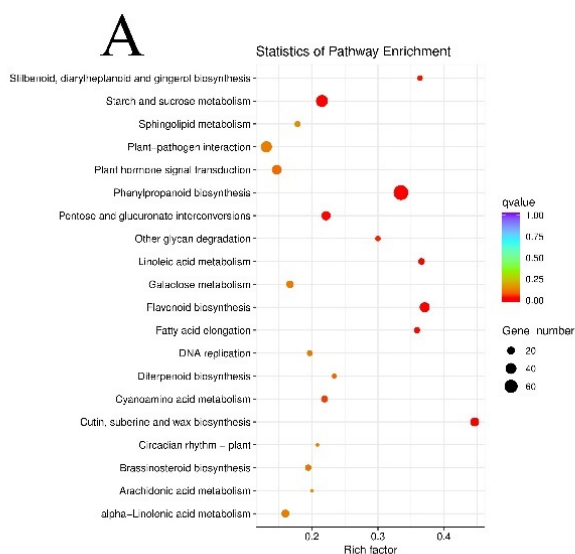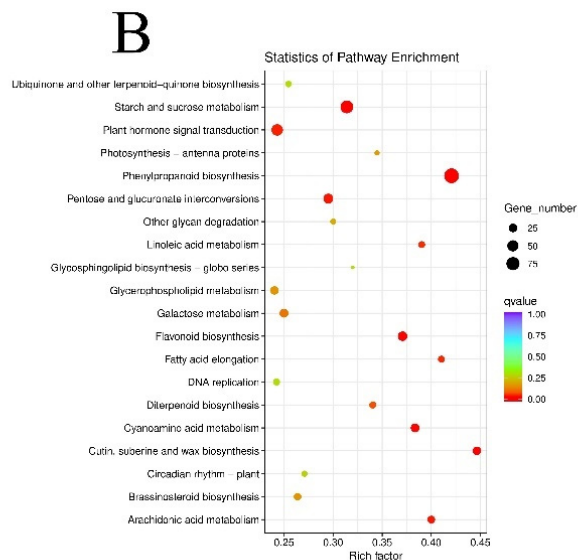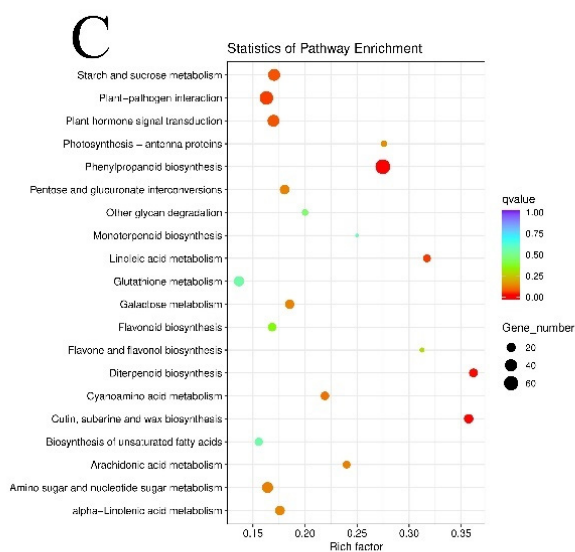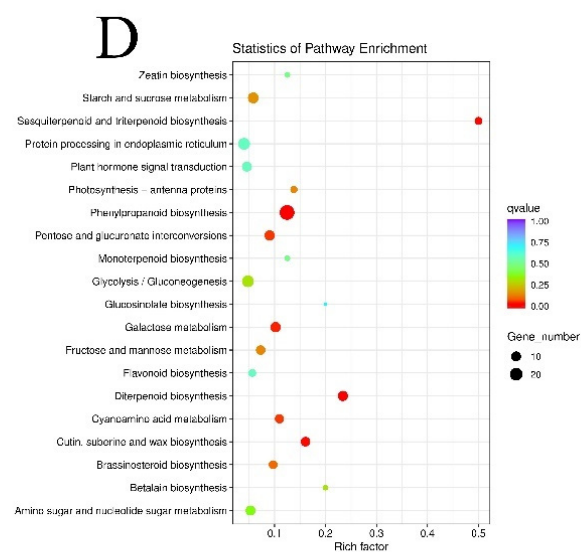

A: Mtr5vsMtr4    B: Mtr6vsMtr5;    C: Mtr7vsMtr6;    D: Mtr11vsMtr7
