# Supplementary material for: Morpho-Histology, Endogenous Hormone Dynamics, and Transcriptome Profiling in Dacrydium Pectinatum during Male Cone Development
Source: MDPI journal article supplement (doi:10.3390/f12111598), 2021-11-19
Supplement: s1 [file s1]

**Supplementary Table S4.** RT-qPCR results of seven MADS-box unigenes and their comparisons with RNA-seq analysis.

| Unigene ID          | Timepoint comparisons   | RT-PCR ( $2^{-\Delta\Delta CT}$ ) | <i>P</i> -value | Consistency with RNAseq | Annotation (Blastx)                                                               |
|---------------------|-------------------------|-----------------------------------|-----------------|-------------------------|-----------------------------------------------------------------------------------|
| Cluster-11431.10014 | July 2 vs. May 10       | 1.79±0.21                         | 0.019251        | Y                       | MADS-box transcription factor GbMADS5                                             |
| Cluster-11431.12684 | November 11 vs. May 10  | -0.36±0.57                        | 0.025           | Y                       | K-box region//SRF-type transcription factor (DNA-binding and dimerisation domain) |
| Cluster-11431.10094 | June 3 vs. May 10       | 3.20±0.49                         | 1.79E-06        | Y                       | B-class MADS-box transcription factor                                             |
|                     | May 10 vs. April 8      | -5.69±1.01                        | 4.22E-06        | Y                       |                                                                                   |
|                     | July 2 vs. May 10       | 16.33±1.24                        | 1.83E-05        | Y                       |                                                                                   |
|                     | November 11 vs. May 10  | 12.23±1.04                        | 1.10E-09        | Y                       |                                                                                   |
| Cluster-11431.21928 | June 3 vs. May 10       | -0.80±0.44                        | 3.25E-47        | Y                       | TM8-like MADS-box transcription factor                                            |
|                     | November 11 vs. May 10  | 2.37±0.54                         | 7.46E-10        | Y                       |                                                                                   |
|                     | June 3 vs May 10        | -0.80±0.44                        | 3.25E-47        | Y                       |                                                                                   |
| Cluster-11431.38306 | November 11 vs. April 8 | 7.317±0.93                        | 3.52E-05        | Y                       | MADS-box protein JOINTLESS                                                        |
|                     | November 11 vs. June 3  | 4.34±0.47                         | 3.51E-05        | Y                       |                                                                                   |
| Cluster-11431.38307 | November 11 vs. April 8 | -5.27±1.11                        | 0.00045391      | N                       | MADS-box protein AeAP3-2-like                                                     |
| Cluster-11431.4568  | June 3 vs. May 10       | 3.57±0.71                         | 2.09E-19        | N                       | MADS-box transcription factor GbMADS5                                             |
|                     | November 11 vs. May 10  | 10.74±1.95                        | 5.66E-18        | N                       |                                                                                   |
|                     | June 3 vs. April 8      | -4.22±0.282                       | 2.12E-11        | Y                       |                                                                                   |
