# Supplementary material for: Morpho-Histology, Endogenous Hormone Dynamics, and Transcriptome Profiling in Dacrydium Pectinatum during Male Cone Development
Source: MDPI journal article supplement (doi:10.3390/f12111598), 2021-11-19
Supplement: s1 [file s1]

**Supplementary Table S2.** Summary of RNA sequencing statistics of *Dacrydium pectinatum* leave and male cone tissues.

| Sample                        | Raw Data Size (bp) | Raw Data Number | Clean Data Number | Clean Data size (bp) | Clean Data Rate (%) | Q20 rate (%) | GC Content (%) |
|-------------------------------|--------------------|-----------------|-------------------|----------------------|---------------------|--------------|----------------|
| Leaf 1 (L1, April 8)          | 7.82G              | 104312600       | 101475903         | 7.61G                | 99.97               | 97.66        | 44.77          |
| Leaf 2 (L2, May 10)           | 7.11G              | 94864105        | 92670975          | 6.95G                | 99.97               | 97.72        | 44.59          |
| Leaf 3 (L3, June 3)           | 7.42G              | 98859476        | 96636167          | 7.25G                | 99.97               | 97.73        | 44.99          |
| Leaf 4 (L4, July 3)           | 6.99G              | 93244993        | 90593535          | 6.79G                | 99.97               | 97.84        | 45.03          |
| Leaf 5 (L5, November 11)      | 7.59G              | 101275585       | 98358305          | 7.37G                | 99.98               | 97.94        | 44.99          |
| Male cone 1 (M1, April 8)     | 7.80G              | 103961857       | 101208941         | 7.59G                | 99.97               | 97.52        | 44.78          |
| Male cone 2 (M2, May 10)      | 7.26G              | 96803433        | 94395672          | 7.08G                | 99.97               | 97.69        | 45.00          |
| Male cone 3 (M3, June 3)      | 7.19G              | 95823704        | 93155671          | 6.99G                | 99.97               | 97.63        | 44.65          |
| Male cone 4 (M4, July 3)      | 6.92G              | 92311763        | 89532572          | 6.71G                | 99.97               | 97.73        | 44.88          |
| Male cone 5 (M5, November 11) | 7.00G              | 93357571        | 90548016          | 6.79G                | 99.97               | 97.72        | 44.52          |
| Average                       | 7.31G              | 97482509        | 94857576          | 7.11G                | 99.97               | 97.72        | 44.82          |
