# Supplementary material for: Morpho-Histology, Endogenous Hormone Dynamics, and Transcriptome Profiling in Dacrydium Pectinatum during Male Cone Development
Source: MDPI journal article supplement (doi:10.3390/f12111598), 2021-11-19

**Supplementary Figure S7.** Expression dynamics of *Dacrydium pectinatum* floral gene homologs differentially expressed during male cone development. ELF: EARLY FLOWERING, LH1: LATE ELONGATED HYPOCOTYL, GI: GIGANTEA, CO: CONSTANS, FT: FLOWERING LOCUS T, PHY: PHYTOCHROME, CYR: CRYPTOCHROME, FRI: FRIGIDA, FLC: FLOWERING LOCUS C, SOC1: SUPPRESSOR OF OVEREXPRESSION OF CO 1, PRC: POLYCOMB REPRESSIVE COMPLEX, MED: MEDIATOR, FCA: FLOWERING CONTROL LOCUS A, FPA: FLOWER LOCUS PA, FLK: FLOWERING LOCUS KHDOMAN, FY: FLOWER LOCUS Y, SPL3: SQUAMOSA-PROMOTER BINDING PROTEIN-LIKE3, PIF: PHYTOCHROME INTERACTING FACTOR, AARP6: CTIN RELATED PROTEIN 6, SOC1: SUPPRESSOR OF OVER-EXPRESSION OF CONSTANS 1, FUL: FRUITFULL.

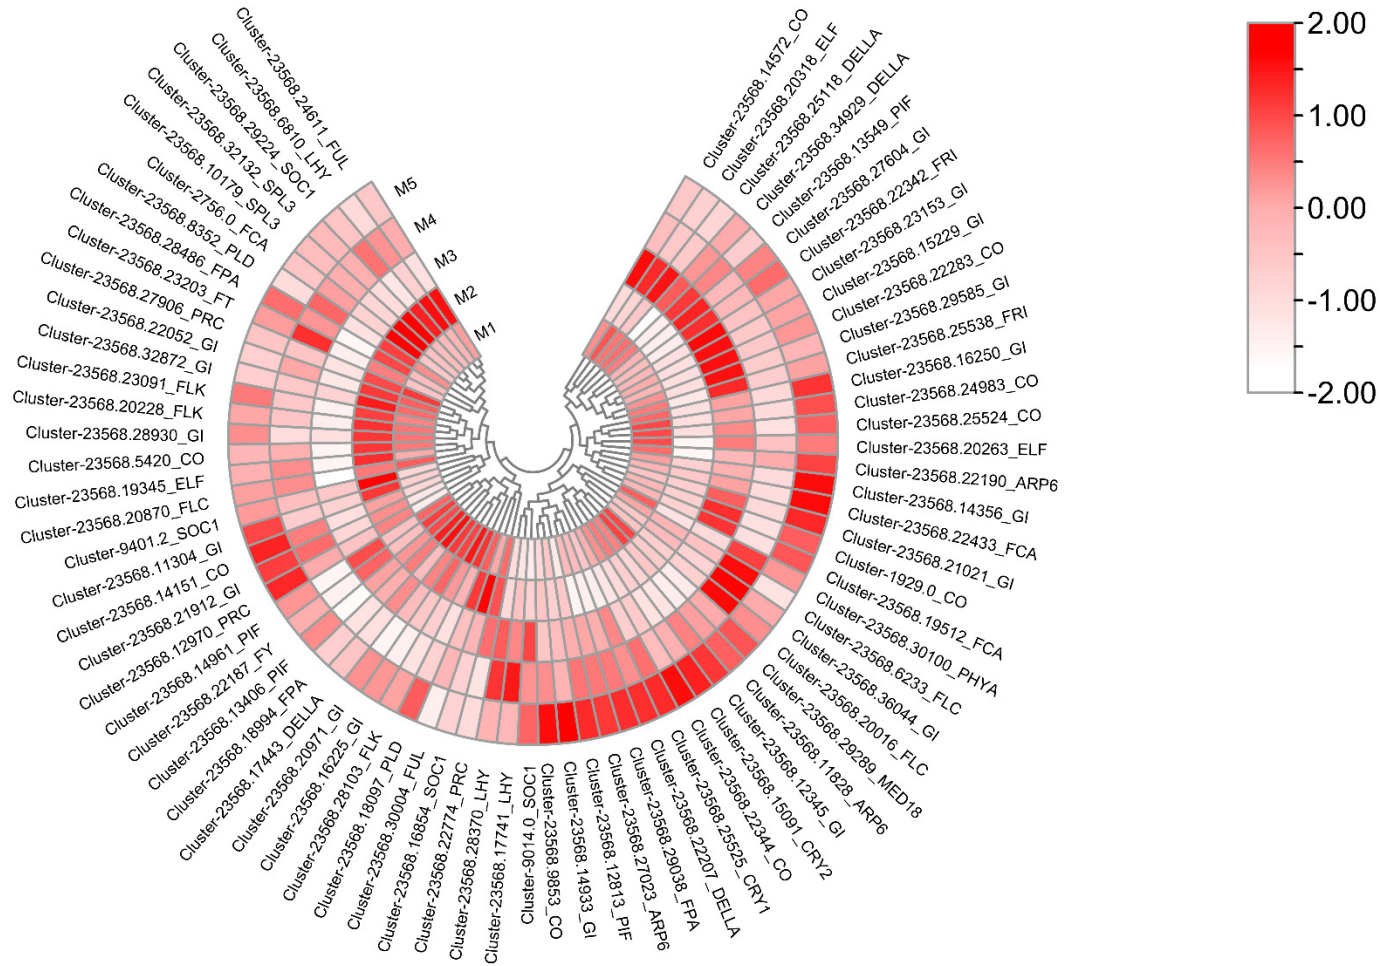

Supplement: s1 [file s1]
