# Supplementary material for: Morpho-Histology, Endogenous Hormone Dynamics, and Transcriptome Profiling in Dacrydium Pectinatum during Male Cone Development
Source: MDPI journal article supplement (doi:10.3390/f12111598), 2021-11-19
Supplement: s1 [file s1]

**Supplementary Table S5.** Differentially expressed unigenes during *D. pectinatum* male cone development that are involved in plant hormones biosynthesis or metabolism.

| Plant hormones | Gene ID                                                                                                                                                                                                                                                                                                                                      | Annotated genes                                                 |
|----------------|----------------------------------------------------------------------------------------------------------------------------------------------------------------------------------------------------------------------------------------------------------------------------------------------------------------------------------------------|-----------------------------------------------------------------|
| IAA            | Cluster-23568.16799                                                                                                                                                                                                                                                                                                                          | <i>Auxin transporter-like protein 1</i>                         |
|                | Cluster-23568.10352                                                                                                                                                                                                                                                                                                                          |                                                                 |
|                | Cluster-23568.30406                                                                                                                                                                                                                                                                                                                          |                                                                 |
|                | Cluster-23568.26471                                                                                                                                                                                                                                                                                                                          |                                                                 |
|                | Cluster-23568.20803                                                                                                                                                                                                                                                                                                                          | <i>Auxin transporter-like protein 2</i>                         |
|                | Cluster-23568.2364<br>Cluster-25286.0                                                                                                                                                                                                                                                                                                        | <i>Methylesterase 1</i>                                         |
| CTK            | Cluster-23568.33453                                                                                                                                                                                                                                                                                                                          | <i>Cytokinin trans-hydroxylase</i>                              |
|                | Cluster-23456.0                                                                                                                                                                                                                                                                                                                              | <i>Cytokinin riboside 5'-monophosphate phosphoribohydrolase</i> |
|                | Cluster-23568.2310<br>Cluster-23568.173<br>Cluster-23568.37201<br>Cluster-23568.7998                                                                                                                                                                                                                                                         | <i>Cytokinin dehydrogenase</i>                                  |
|                | Cluster-23568.21188                                                                                                                                                                                                                                                                                                                          | <i>Adenylate kinase</i>                                         |
| GA             | Cluster-23568.15405<br>Cluster-23568.31782<br>Cluster-23568.31781<br>Cluster-23568.22762<br>Cluster-23568.27305<br>Cluster-23568.27307<br>Cluster-23568.31779<br>Cluster-23568.20922<br>Cluster-23568.16547<br>Cluster-23568.26342<br>Cluster-23568.14123<br>Cluster-23568.14120<br>Cluster-23568.14121<br>Cluster-21843.0<br>Cluster-3358.0 | <i>ent-Copalyl diphosphate synthase</i>                         |
|                | Cluster-23568.28824<br>Cluster-23568.6200                                                                                                                                                                                                                                                                                                    | <i>ent-Kaurene oxidase</i>                                      |
| ABA            | Cluster-489.1                                                                                                                                                                                                                                                                                                                                | <i>9-cis-epoxycarotenoid dioxygenase</i>                        |
|                | Cluster-23568.5249<br>Cluster-23568.7290<br>Cluster-23568.4582                                                                                                                                                                                                                                                                               | <i>Short-chain alcohol dehydrogenase/reductase</i>              |
|                | Cluster-23568.18098<br>Cluster-23568.9872<br>Cluster-23568.17541<br>Cluster-23568.22596                                                                                                                                                                                                                                                      | <i>Molybdenum cofactor sulfurase</i>                            |
|                | Cluster-23568.2501                                                                                                                                                                                                                                                                                                                           | <i>Violaxanthin de-epoxidase</i>                                |
| Ethylene       | Cluster-25862.0<br>Cluster-19940.0<br>Cluster-22270.1                                                                                                                                                                                                                                                                                        | <i>1-aminocyclopropane-1-carboxylic acid synthase</i>           |

|    |                     |                                              |
|----|---------------------|----------------------------------------------|
|    | Cluster-23568.10936 |                                              |
|    | Cluster-7797.0      |                                              |
|    | Cluster-23568.11008 |                                              |
|    | Cluster-11218.0     | <i>1-aminocyclopropane-1-carboxylic acid</i> |
|    | Cluster-23568.19723 | <i>oxidase</i>                               |
|    | Cluster-23568.34367 |                                              |
|    | Cluster-23568.6492  |                                              |
| JA | Cluster-23568.11909 |                                              |
|    | Cluster-23568.39804 |                                              |
|    | Cluster-23568.39805 |                                              |
|    | Cluster-23301.0     |                                              |
|    | Cluster-23568.15845 |                                              |
|    | Cluster-23568.3858  |                                              |
|    | Cluster-23568.1226  |                                              |
|    | Cluster-23568.33077 |                                              |
|    | Cluster-23568.13982 | <i>Phospholipase A1</i>                      |
|    | Cluster-23568.29227 |                                              |
|    | Cluster-23568.31959 |                                              |
|    | Cluster-23568.31823 |                                              |
|    | Cluster-23568.24876 |                                              |
|    | Cluster-23568.23635 |                                              |
|    | Cluster-23568.38544 |                                              |
|    | Cluster-23568.33245 |                                              |
|    | Cluster-23568.20298 |                                              |
|    | Cluster-23568.24865 |                                              |
|    | Cluster-23568.24030 |                                              |
|    | Cluster-23568.23419 |                                              |
|    | Cluster-23568.19298 |                                              |
|    | Cluster-23568.24868 |                                              |
|    | Cluster-23568.25003 | <i>Lipoxygenase</i>                          |
|    | Cluster-23568.15580 |                                              |
|    | Cluster-23568.24044 |                                              |
|    | Cluster-23568.24045 |                                              |
|    | Cluster-23568.24271 |                                              |
|    | Cluster-23568.36921 |                                              |
|    | Cluster-23568.24866 |                                              |
|    | Cluster-23568.24043 |                                              |
|    | Cluster-23568.17790 |                                              |
|    | Cluster-23568.23753 |                                              |
|    | Cluster-23568.27839 |                                              |
|    | Cluster-23568.22812 | <i>Allene oxide synthase</i>                 |
|    | Cluster-23568.29830 |                                              |
|    | Cluster-23568.27187 |                                              |
|    | Cluster-23568.23752 |                                              |
|    | Cluster-23568.10258 | <i>Allene oxide cyclase</i>                  |
