# Supplementary material for: Morpho-Histology, Endogenous Hormone Dynamics, and Transcriptome Profiling in Dacrydium Pectinatum during Male Cone Development
Source: MDPI journal article supplement (doi:10.3390/f12111598), 2021-11-19

**Supplementary Figure S3.** Function classification of *D. pectinatum* unigenes with euKaryotic Orthologous Groups (KOG).

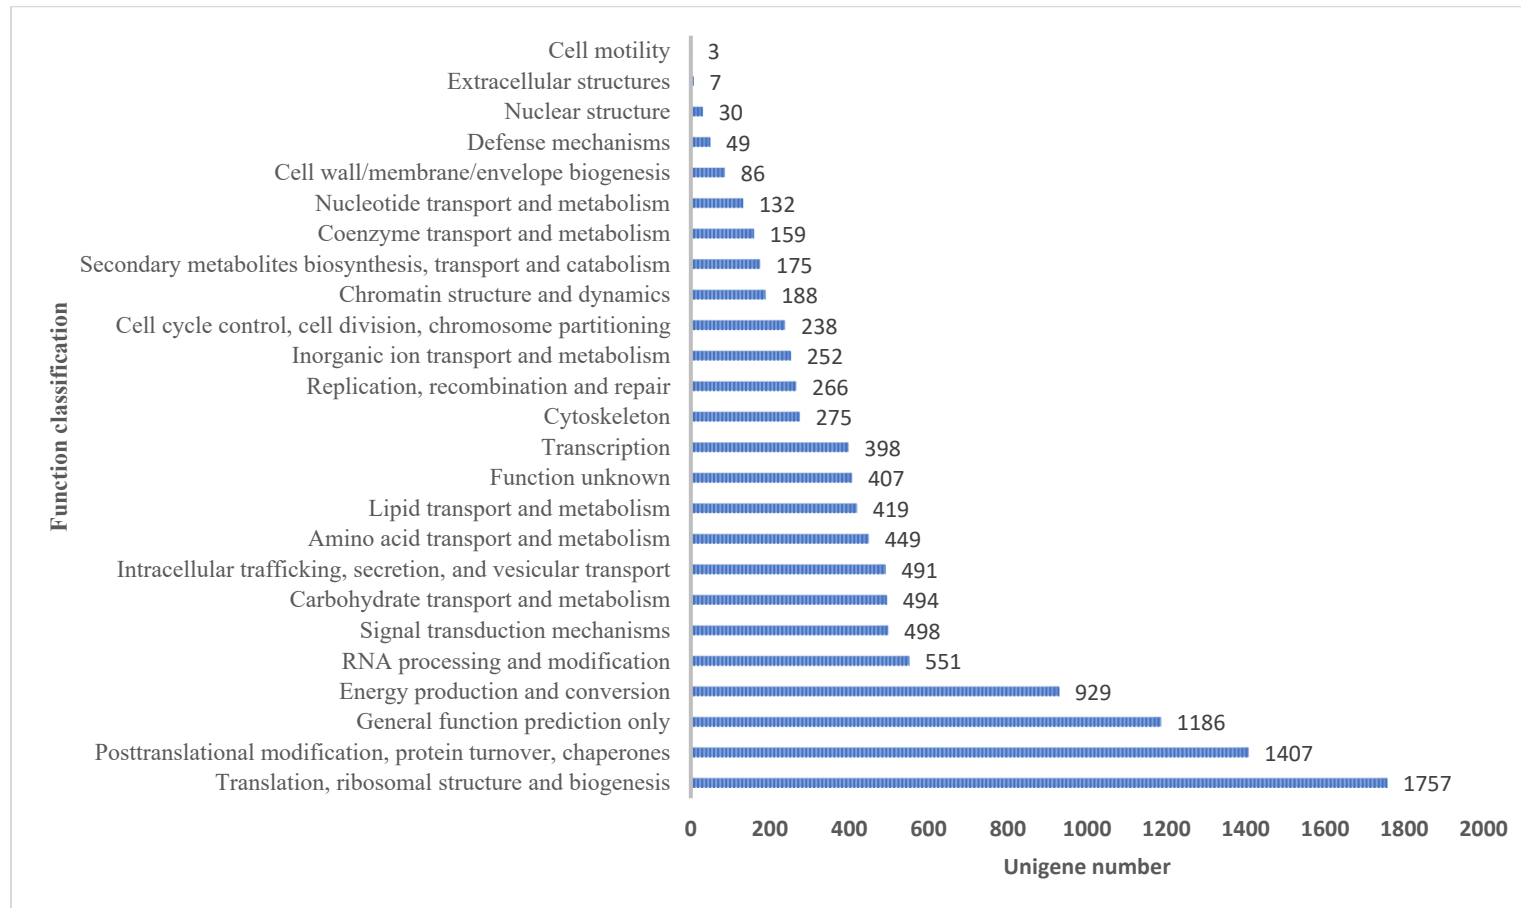

Supplement: s1 [file s1]
