# Supplementary figures and images for: Morpho-Histology, Endogenous Hormone Dynamics, and Transcriptome Profiling in Dacrydium Pectinatum during Male Cone Development
Source: MDPI journal article supplement (doi:10.3390/f12111598), 2021-11-19

**Supplementary Figure S2.** Percentage of unigenes in each *Dacrydium pectinatum* sample type.

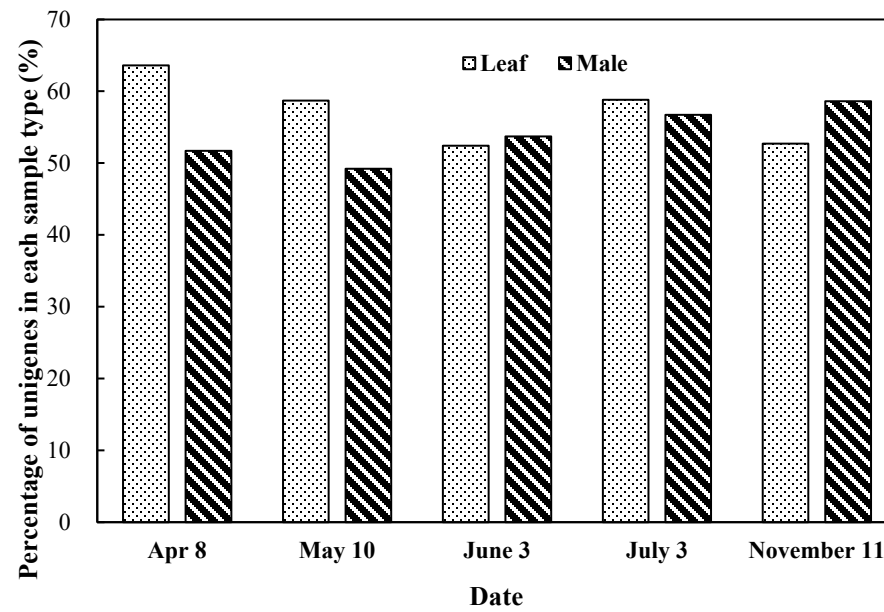

Supplement: s1 [file s1]

Supplementary Figure S1. Pearson correlation of the *Dacrydium pectinatum* RNAseq samples.

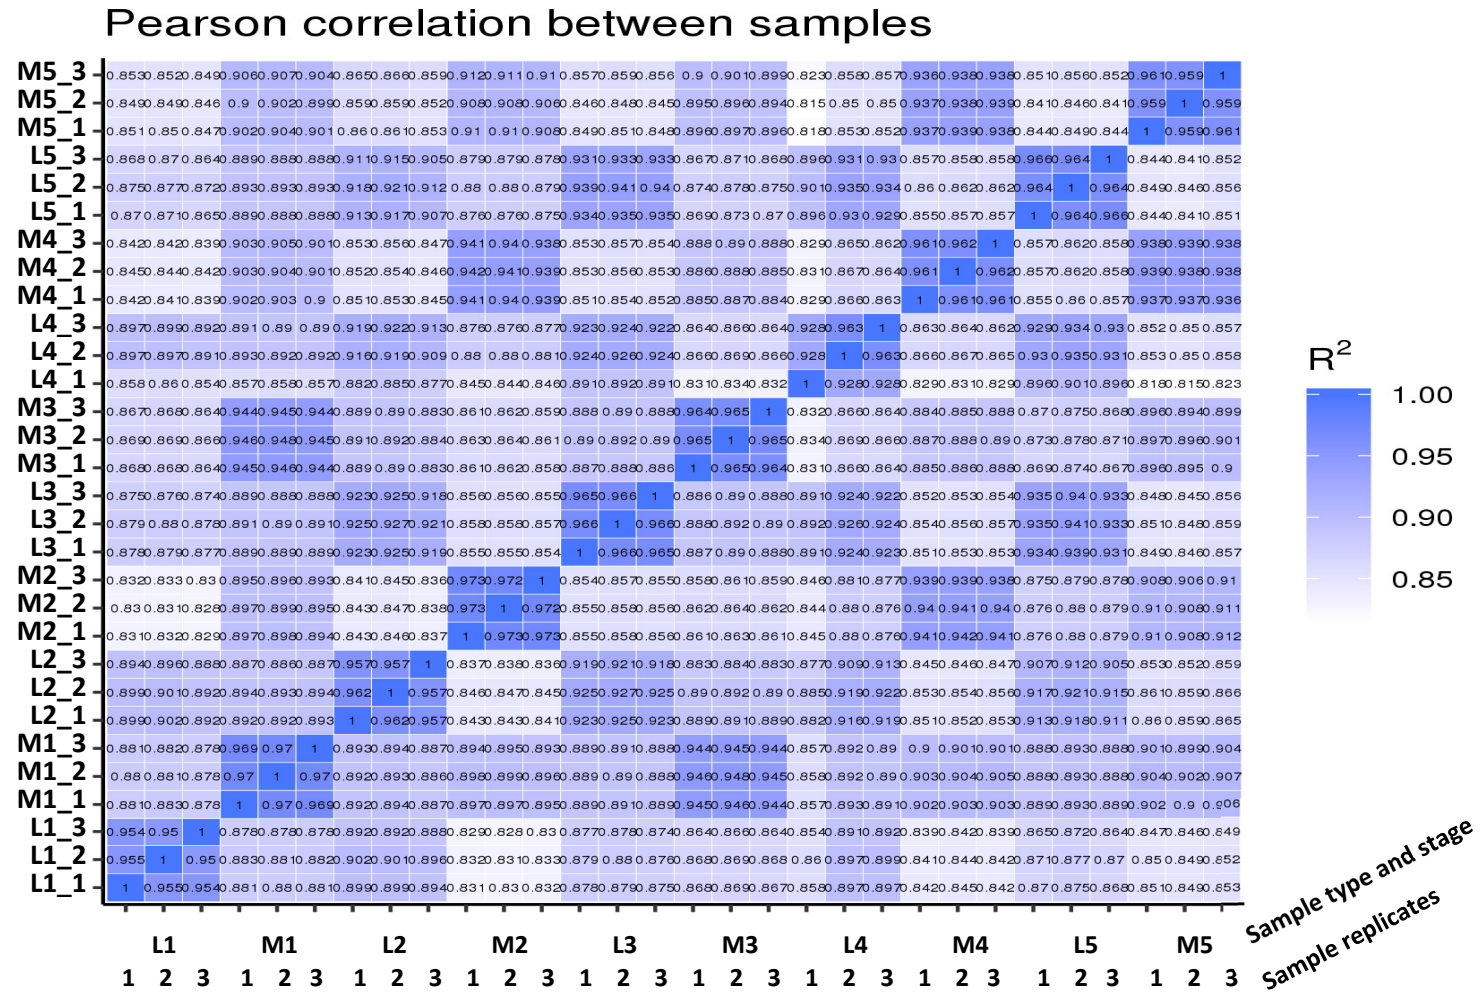

Supplement: s1 [file s1]

**Supplementary Figure S4.** GO annotation of *Dacrydium pectinatum* unigenes.

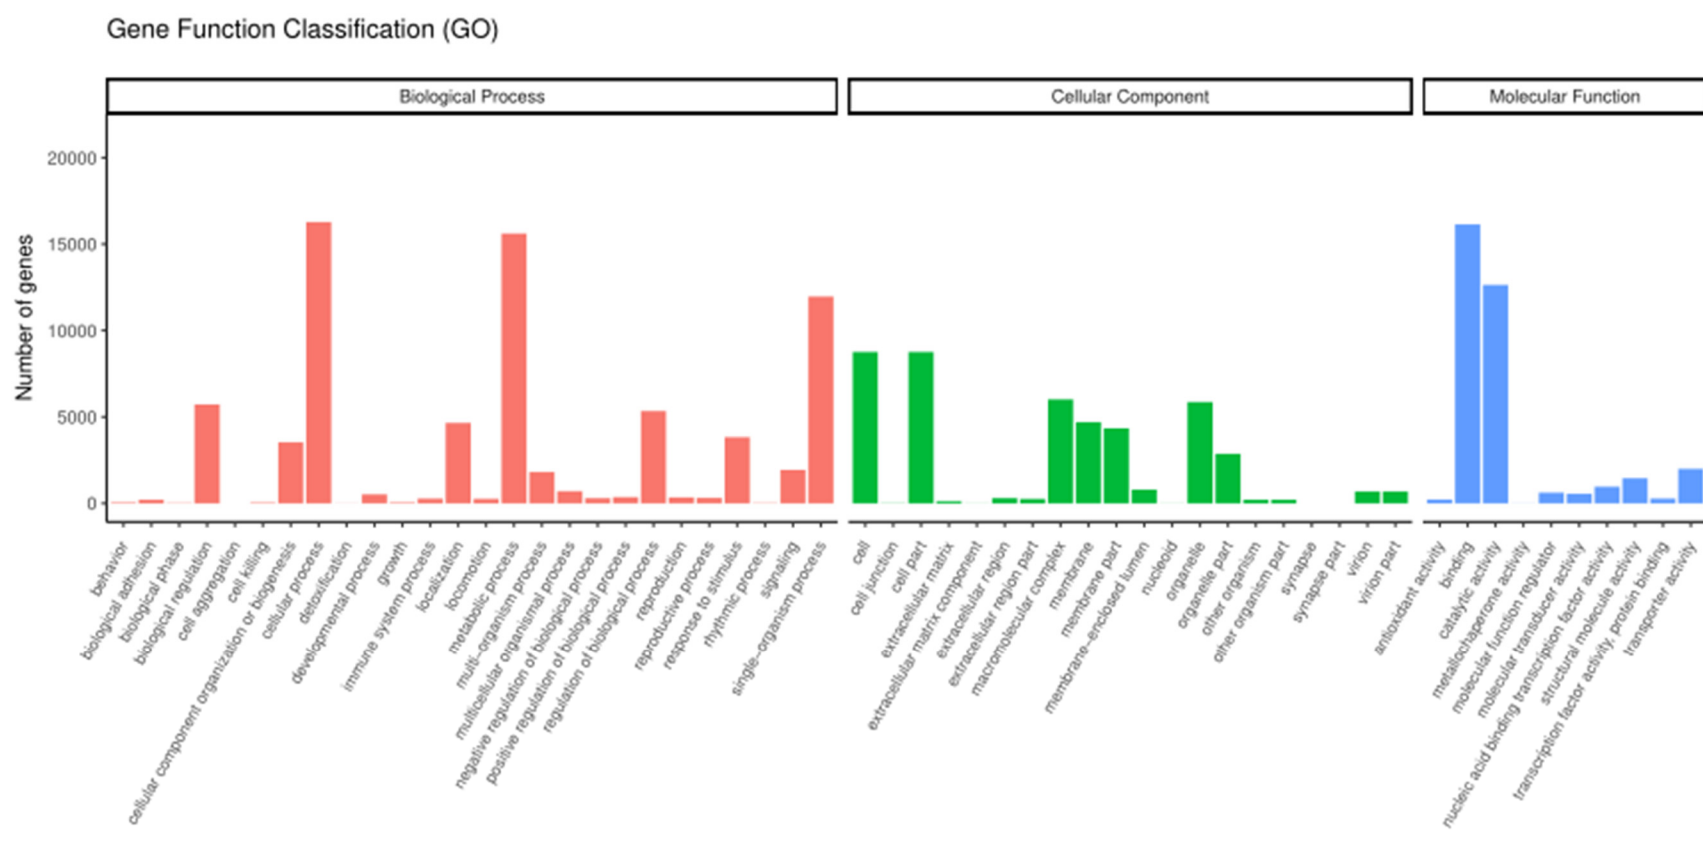

Supplement: s1 [file s1]
